# Supplementary material
Source: PubMed Central journal article supplement (PMC9811596)

**Electronic Supplementary Table 1. Demographic characteristics of the study participants (N=204)**

| Parameters                                                |                              | Values         |
|-----------------------------------------------------------|------------------------------|----------------|
| Age (years) <sup>§</sup>                                  |                              | 66.5 (13.4)    |
| Age categories [n (%)]                                    | Young                        | 12 (5.8)       |
|                                                           | Middle-aged and older adults | 68 (33.2)      |
|                                                           | Elderly                      | 127 (62)       |
| Male: Female                                              |                              | 103: 101       |
| Body weight (kg) <sup>§</sup>                             |                              | 75 (18.1)      |
| CHA <sub>2</sub> DS <sub>2</sub> -VASc score <sup>§</sup> |                              | 3.7 (1.5)      |
| HASBLED score <sup>§</sup>                                |                              | 2.3 (1.1)      |
| SAME-TT <sub>2</sub> R <sub>2</sub> <sup>§</sup>          |                              | 1.4 (0.6)      |
| Duration of warfarin therapy (days) <sup>§</sup>          |                              | 1033.3 (567.8) |
| Drugs with potential interaction [n (%)]                  |                              | 135 (65.9)     |

§ - Mean (SD).

**Electronic Supplementary Figure 1. TTRs during various seasons amongst patients with non-valvular atrial fibrillation.**

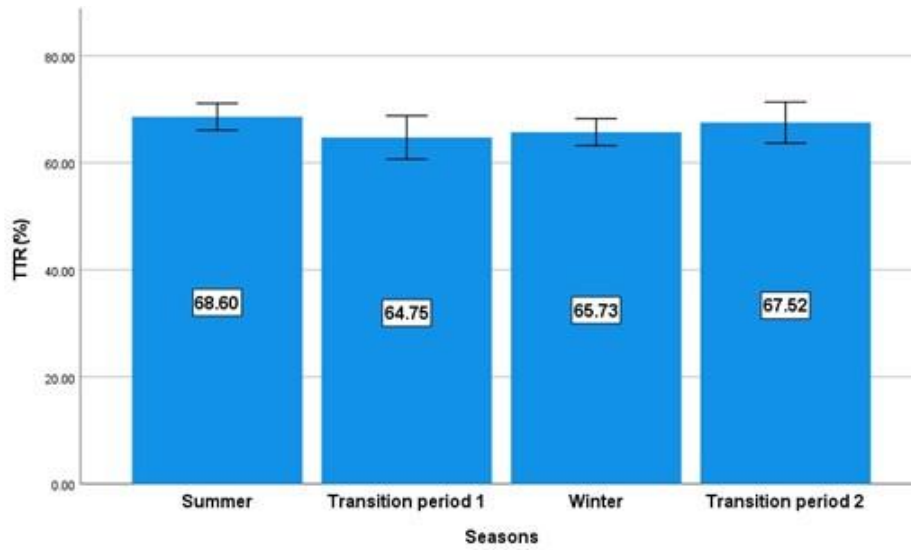

**Electronic Supplementary Figure 2. TTRs during various seasons amongst patients who have undergone heart valve replacement surgery.**

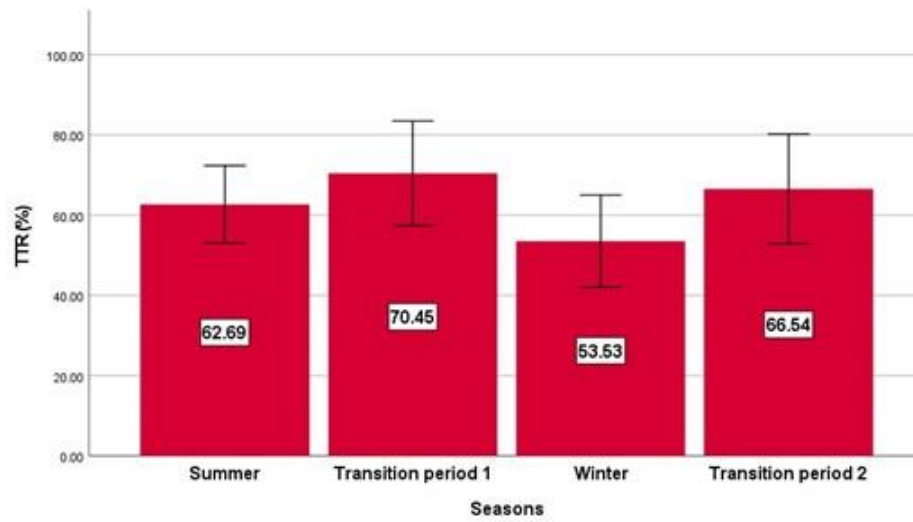

Electronic Supplementary Figure 3. WSI during various seasons amongst male participants.

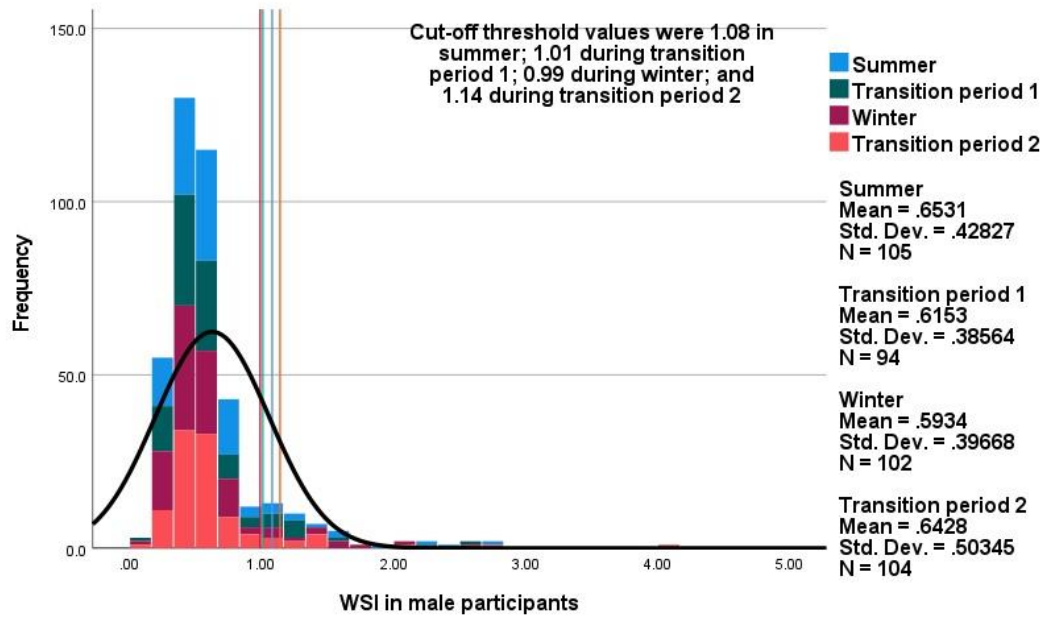

Electronic Supplementary Figure 4. WSI during various seasons amongst female participants.

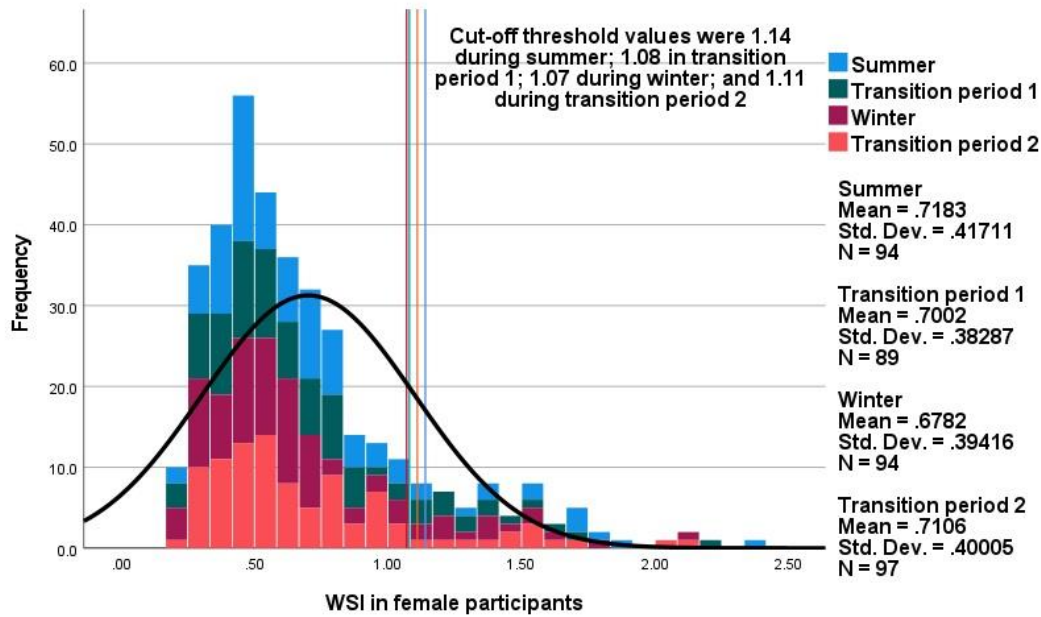

Supplement: ejhpharm-2021-002793supp001.pdf [file ejhpharm-2021-002793supp001.pdf]
